# Supplementary material
Source: PubMed Central journal article supplement (PMC3708357)
Supplement: supp_M033464_jlr.M033464-1.pdf [file supp_M033464_jlr.M033464-1.pdf]

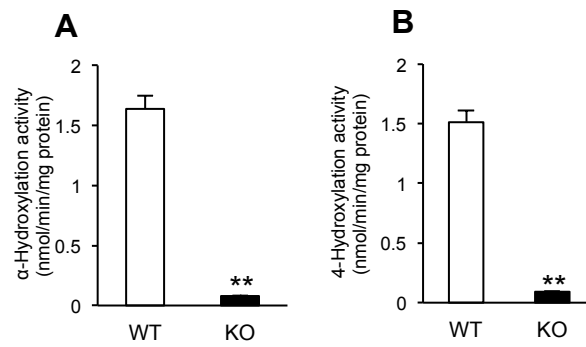

**Supplemental Fig. 1.  $\alpha$ -Hydroxylation (A) and 4-hydroxylation (B) activities of triazolam in liver microsomes of wild-type (WT) and *Cyp3a*<sup>-/-</sup> (KO) mice**

Triazolam (200  $\mu$ M) was incubated with liver microsomes of WT and KO mice as described in elsewhere (27). Data are shown as means  $\pm$  S. E. M. of three mice in each group. Liver microsomes prepared from each mouse were used for three independent determinations, each performed in duplicate. \*\* $P$  < 0.01 versus WT mice.
