# Supplementary material
Source: PubMed Central journal article supplement (PMC3708357)
Supplement: supp_M033464_jlr.M033464-2.pdf [file supp_M033464_jlr.M033464-2.pdf]

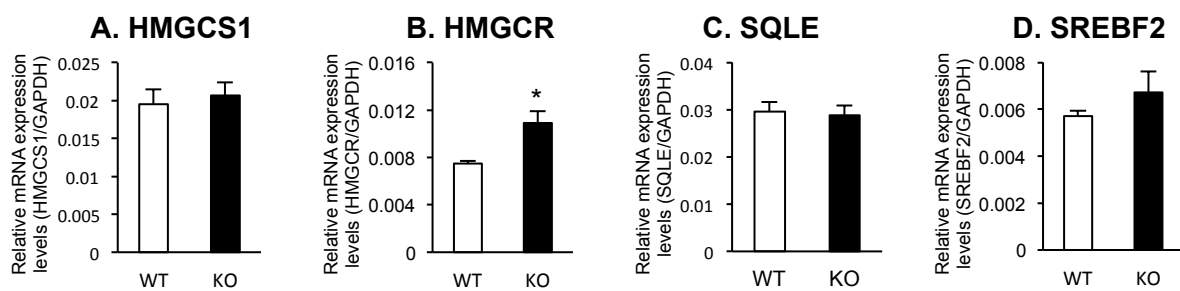

**Supplemental Fig. 2. Expression levels of HMGCS1 (A), HMGCR (B) SQLE (C) and SREBF2 (D) mRNAs in the intestines of WT and KO mice**

Expression levels were normalized by expression levels of GAPDH and are shown as means  $\pm$  S. E. M. of six mice in each group. cDNAs prepared from each mouse were used for triplicate determination. \* $P < 0.05$  versus WT mice.
