# Supplementary material
Source: PubMed Central journal article supplement (PMC3708357)
Supplement: supp_M033464_jlr.M033464-3.pdf [file supp_M033464_jlr.M033464-3.pdf]

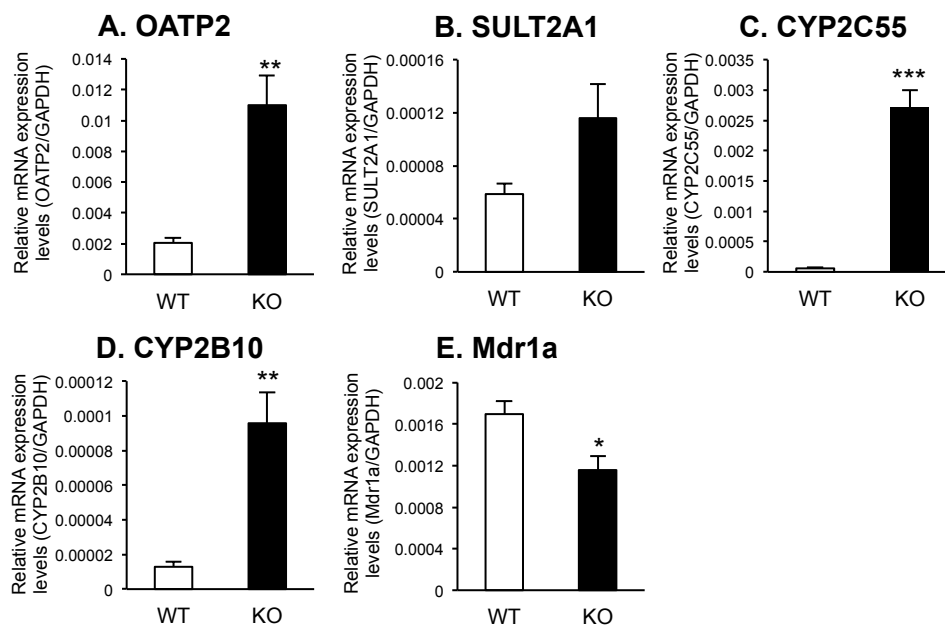

**Supplemental Fig. 3. Expression levels of OATP2 (A), SULT2A1 (B), CYP2C55 (C), CYP2B10 (D) and Mdr1a (E) mRNAs in the livers of WT and KO mice**

Expression levels of OATP2 and SULT2A1 were measured by SYBR Green based real-time PCR. The PCR primers used were as follows: OATP2, 5'-ATTCGTGAGTTACTTCGGAACA-3' and 5'-CCCATAACTGCACATCCTACAC-3'; SULT2A1, 5'-CCTCCCATCTCCCATCCAT-3' and 5'-CTCACGAGATAGATCGCCTTGG-3'. Expression levels of CYP2C55, CYP2B10 and Mdr1a mRNA were measured using TaqMan Gene Expression Assays. (Mm00472168\_m1, Mm00456591\_m1 and Mm00440736\_m1, Applied Biosystems). Expression levels were normalized by expression levels of GAPDH and are shown as means  $\pm$  S. E. M. of six mice in each group. cDNAs prepared from each mouse were used for triplicate determination. \* $P < 0.05$ , \*\* $P < 0.01$  and \*\*\* $P < 0.001$  versus WT mice.
