# Supplementary material
Source: PubMed Central journal article supplement (PMC3708357)
Supplement: supp_M033464_jlr.M033464-4.pdf [file supp_M033464_jlr.M033464-4.pdf]

**Supplemental Table 1. Sequences of primers used in real-time PCR**

| <b>Gene</b> | <b>Forward Primer (5' to 3')</b> | <b>Reverse Primer (5' to 3')</b> |
|-------------|----------------------------------|----------------------------------|
| Hmgcs1      | TGGCACAGTACTCACCTC               | CCTTCATCCAAACTGTGG               |
| Hmgcr       | CTTGTGGAATGCCTTGTGATTG           | AGCCGAAGCAGCACATGAT              |
| Sqle        | AAATCAGAGCCGTGGGCTAC             | GGAAGTGACACAGTTCTATG             |
| Srebf2      | GGTCCTCCATCAACGACAA              | CTCAGAACGCCAGACTTGTGC            |
| Abcg5       | ATCGCAGCCCAACTCCTTCAG            | CAGTCCAGTCCTGTGGTTGGC            |
| Abcg8       | GCCACCCTTGTCTCGCTA               | TTCTTTGCTGCGTCTGTGCGAT           |
| Abca1       | GATGTGGAATCGTCCCTCAGTTC          | ACTGCTCTGAGAAACTGTCTCC           |
| Ldlr        | GTGCATGGCTTCATGTAC               | TCATAGATGGCCAAGGAG               |
| Npc1l1      | TCTACTGTGCCAATGCCCTCTC           | CCCGTAGTCAGCTATGCAGCTCA          |
| Cyp7a1      | AGCAACTAAACAACCTGCCAGTACTA       | GTCCGGATATTCAAGGATGCA            |
| Cyp8b1      | GAAGATCCACCACTACAGCAT            | GGACAAAGGTCTTCATCTCG             |
| Cyp27a1     | CCAGGCACAGGAGAGTACG              | GGGCAAGTGCAGCACATAG              |
| Cyp7b1      | GAAAACCTTTCAAAGGCAACATGG         | ACTGGAAAGGGTTCAGAACAAATG         |
| Shp         | TTCAACCCAGATGTGCCAGG             | CTCCTGTTGCAGGTGTGCGA             |
| Gapdh       | TGCACCACCAACTGCTTA               | GGATGCAGGGATGATGTTC              |
