# Supplementary material
Source: PubMed Central journal article supplement (PMC3708357)
Supplement: supp_M033464_jlr.M033464-5.pdf [file supp_M033464_jlr.M033464-5.pdf]

**Supplemental Table 2. Nutrient composition of CE-2 diets**

| <b>Nutrient</b>              |      |
|------------------------------|------|
| Moisture (%)                 | 8.9  |
| Crude protein (%)            | 24.9 |
| Crude fat (%)                | 4.6  |
| Crude fiber (%)              | 4.1  |
| Crude ash (%)                | 6.6  |
| Nitrogen-free extract (%)    | 51.0 |
| Energy (kcal/g) <sup>a</sup> | 3.4  |

Values and nutrients are provided in the catalog of CLEA Japan Inc. (2013).

<sup>a</sup>Physiological fuel value with no caloric value for crude fiber.
